# Supplementary material for: Understanding greenhouse gas (GHG) column concentrations in Munich using WRF
Source: Copernicus journal article supplement (doi:10.5194/acp-2022-281), 2022-05-17
Supplement: Supplementary file 1 [file acp-2022-281-supplement.zip]

Archive with 4 entries (3 files):
- Support material/
- Support material/Modelled XCO2_BCK for D01 from 19 to 21 August, 2018_small.gif
- Support material/Modelled XCO2_BIO for D01 from 19 to 21 August, 2018.gif
- Support material/Support_material.pdf
