# Supplementary figures and images for: Understanding greenhouse gas (GHG) column concentrations in Munich using WRF
Source: Copernicus journal article supplement (doi:10.5194/acp-2022-281), 2022-05-17

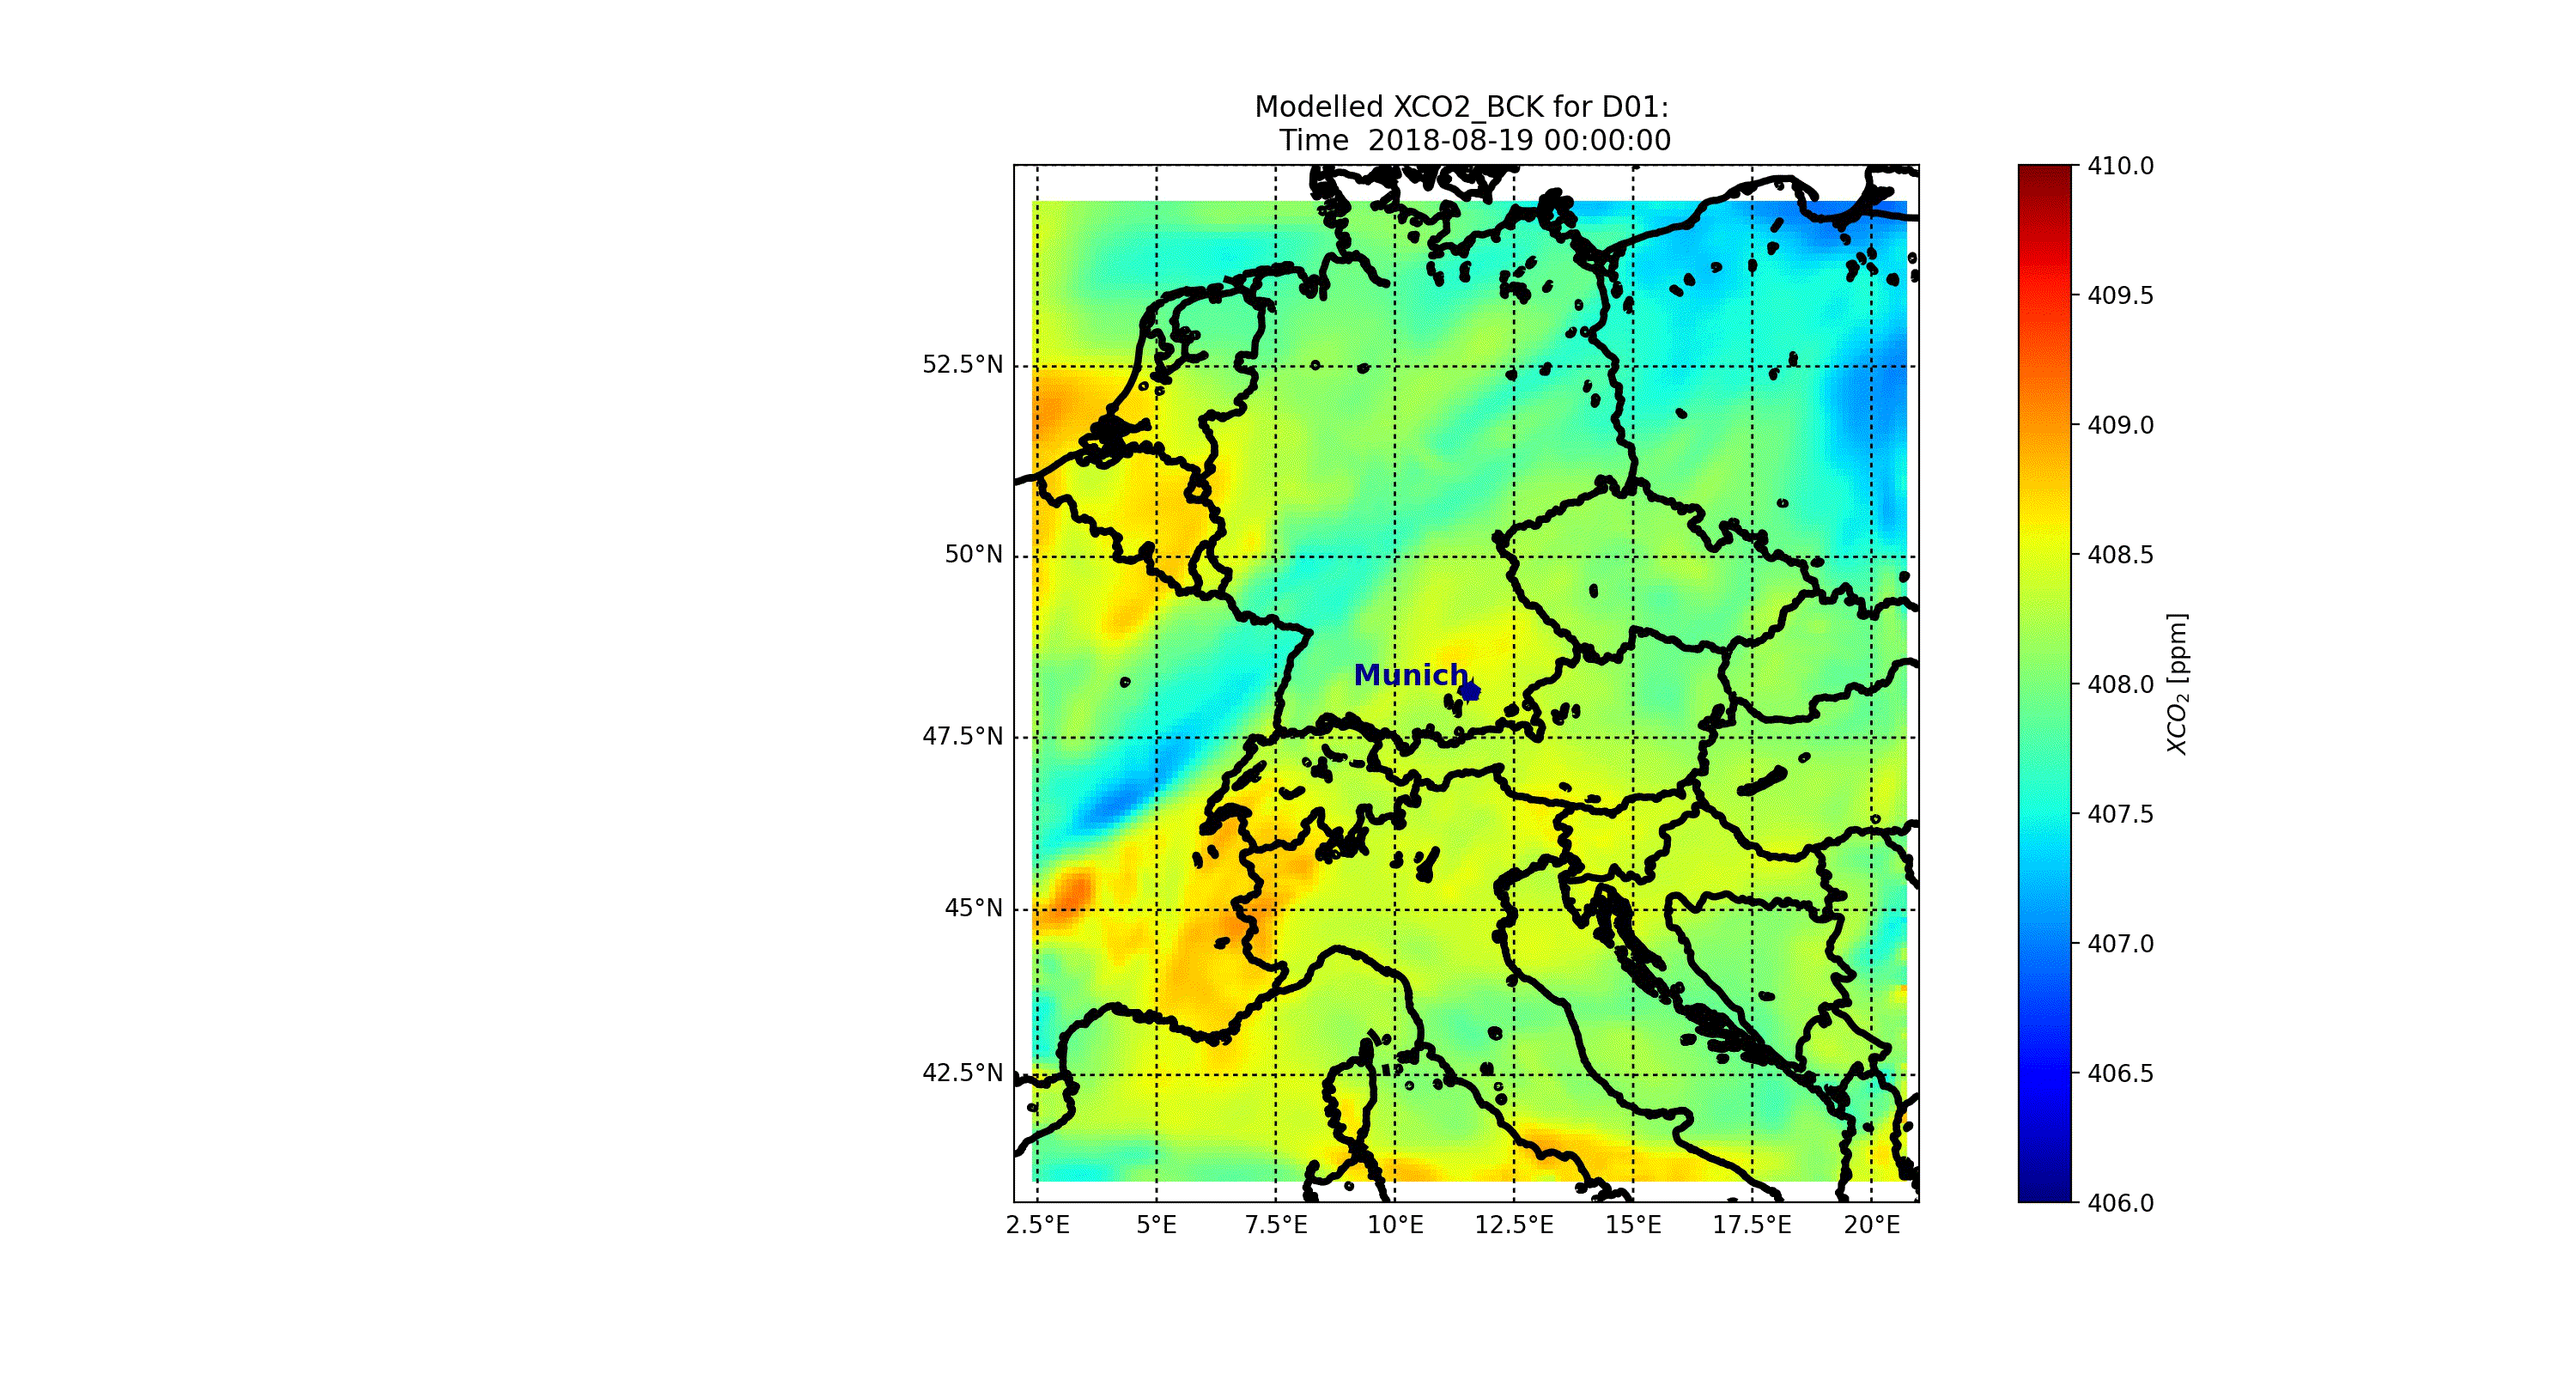

Supplement: Supplementary file 1 [file acp-2022-281-supplement.zip › Support material/Modelled XCO2_BCK for D01 from 19 to 21 August, 2018_small.gif]

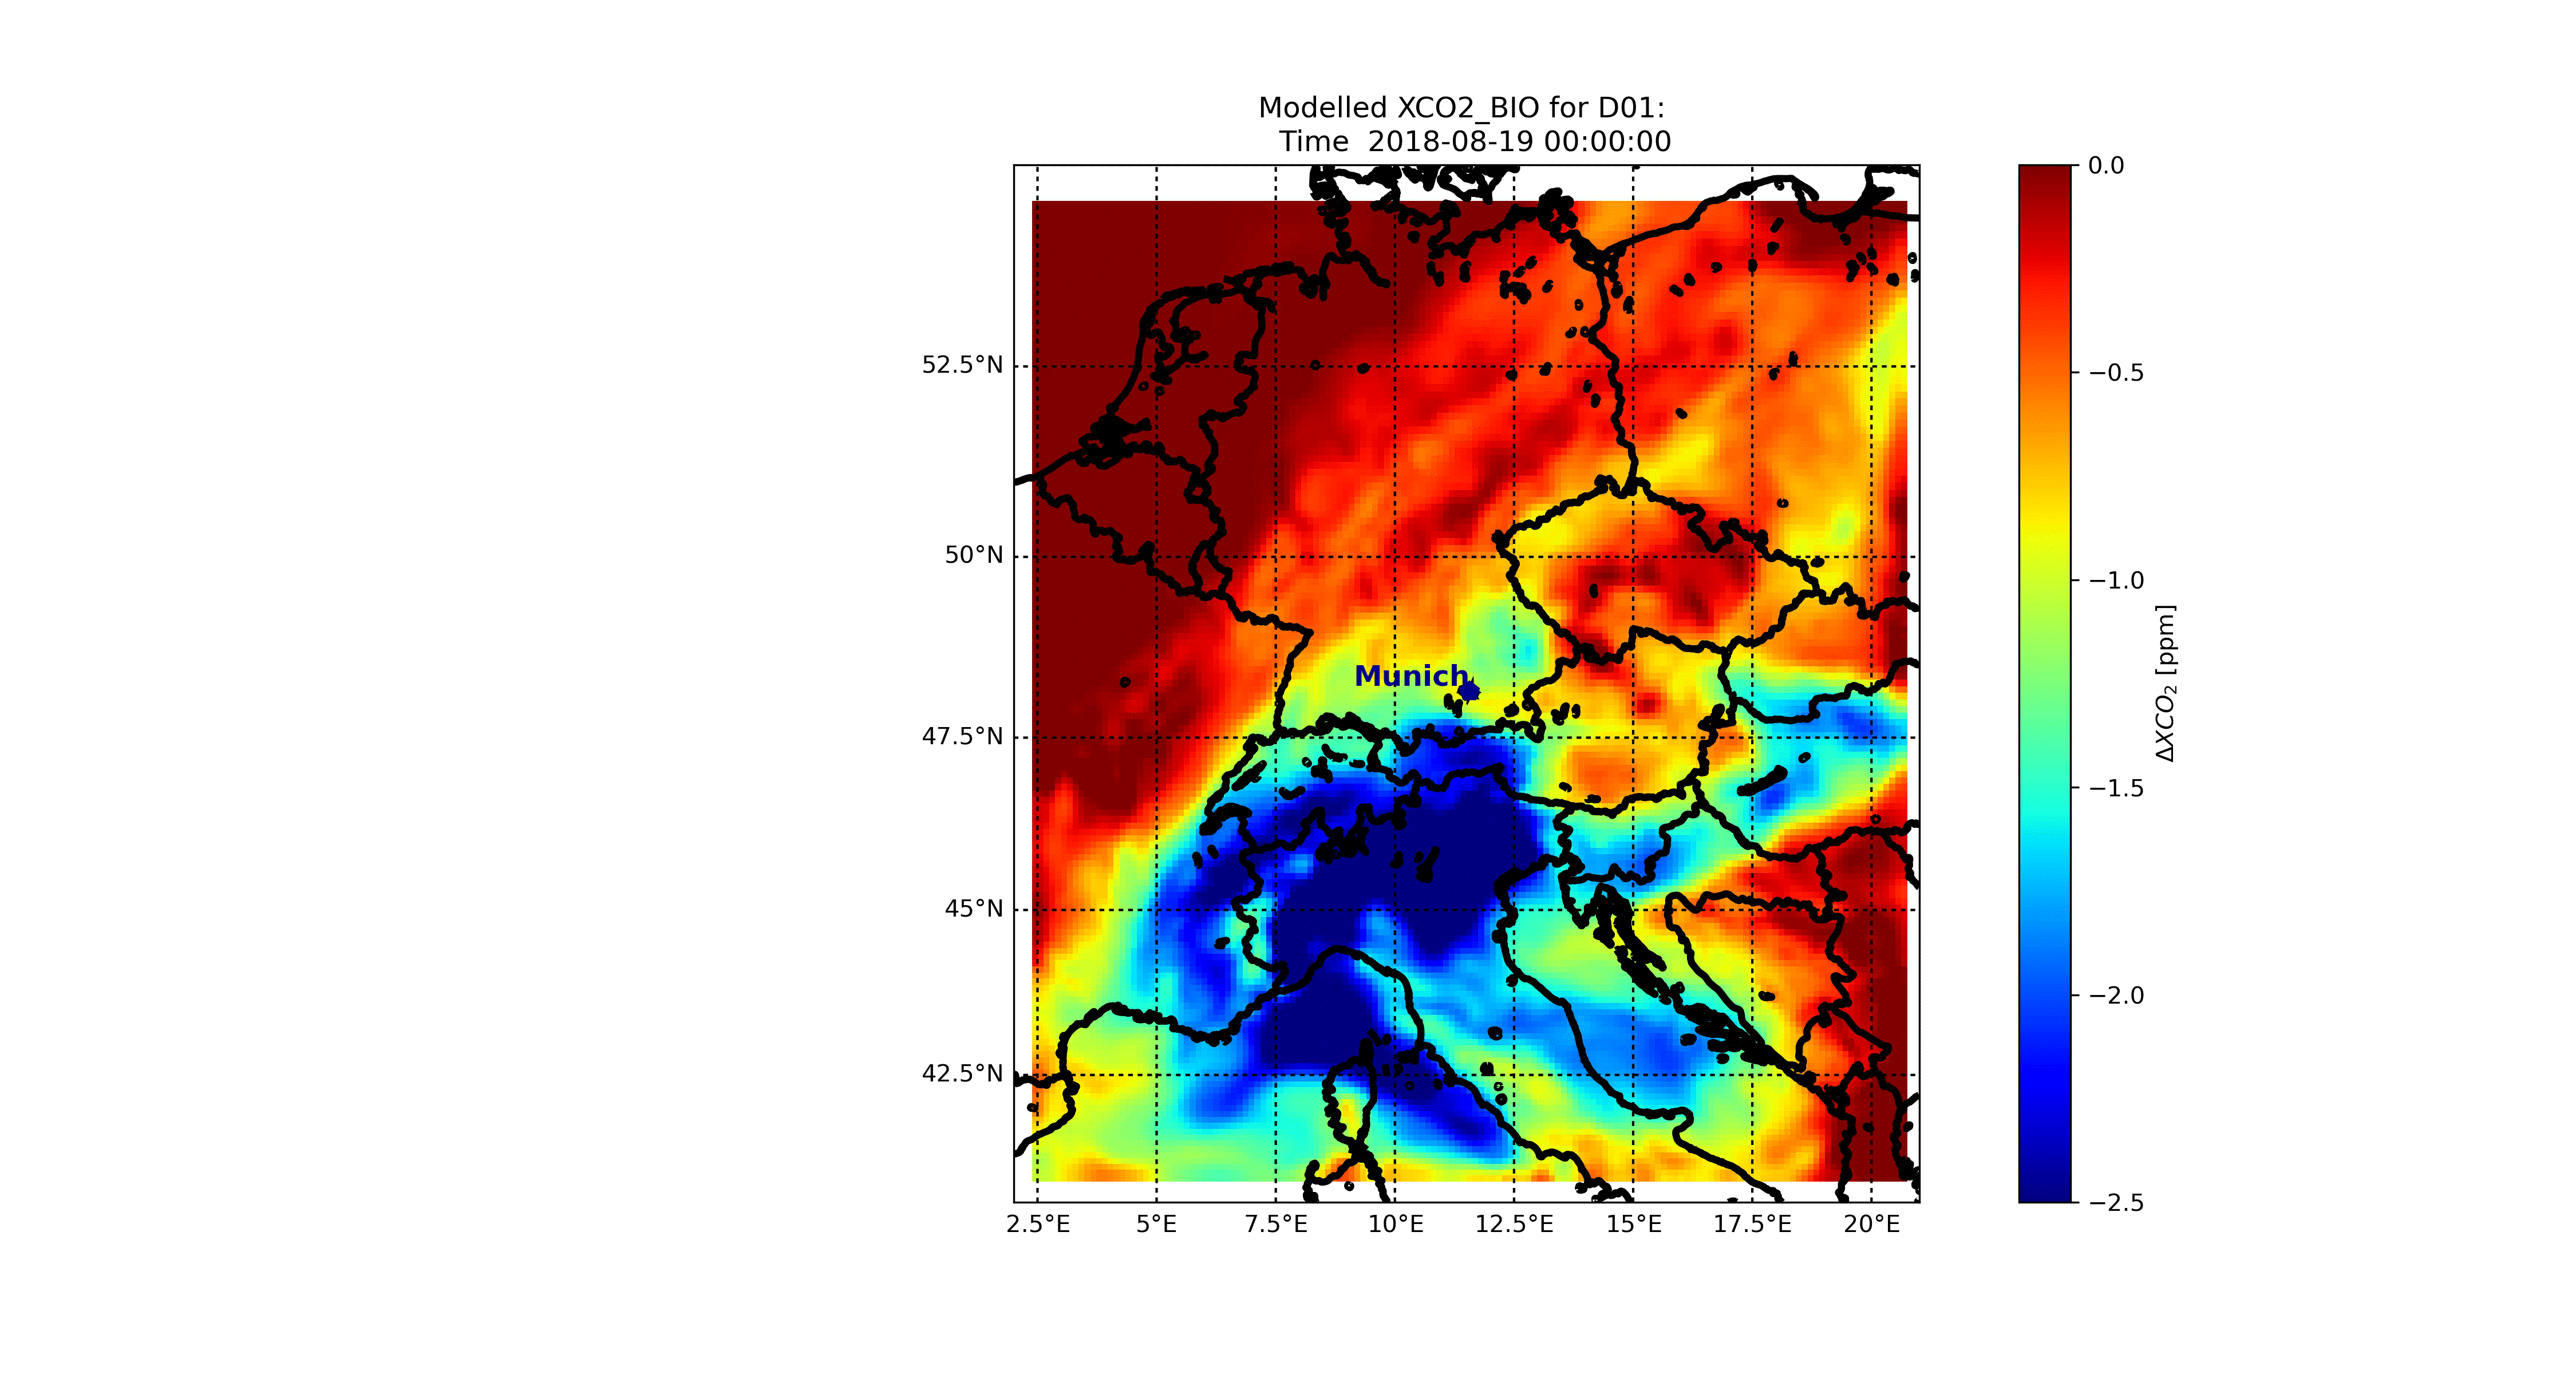

Supplement: Supplementary file 1 [file acp-2022-281-supplement.zip › Support material/Modelled XCO2_BIO for D01 from 19 to 21 August, 2018.gif]
